# Supplementary material for: Assessment of genotyping array performance for genome-wide association studies and imputation in African cattle
Source: PubMed Central journal article supplement (PMC9441065; doi:10.1186/s12711-022-00751-5), 2022-09-04

# Additional file 2 Figure S1

**a**

Ti/Tv truth

2.335 90

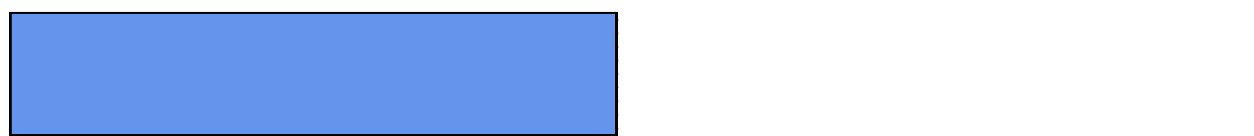

2.273 99

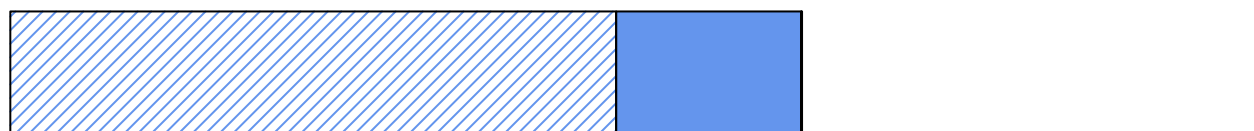

2.216 99.9

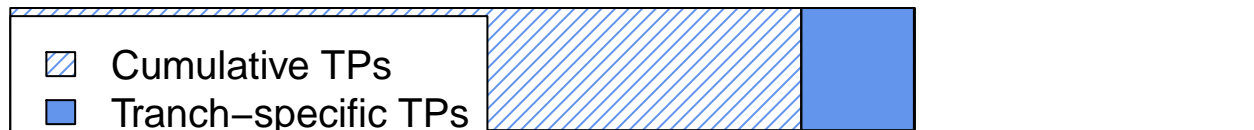

1.991 100

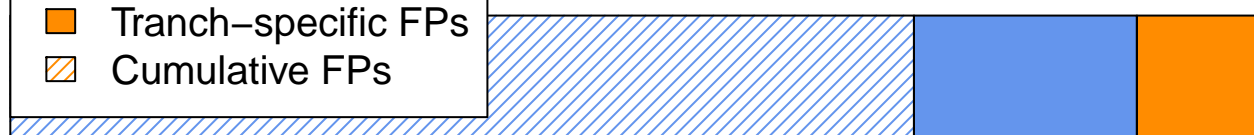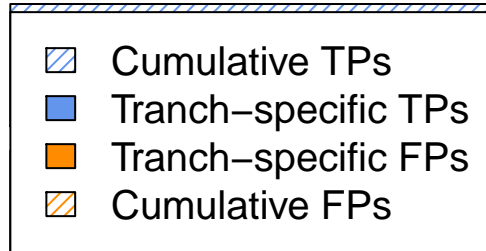

0 10000 20000 30000 40000 50000 60000 70000

Number of Novel Variants (1000s)

**b**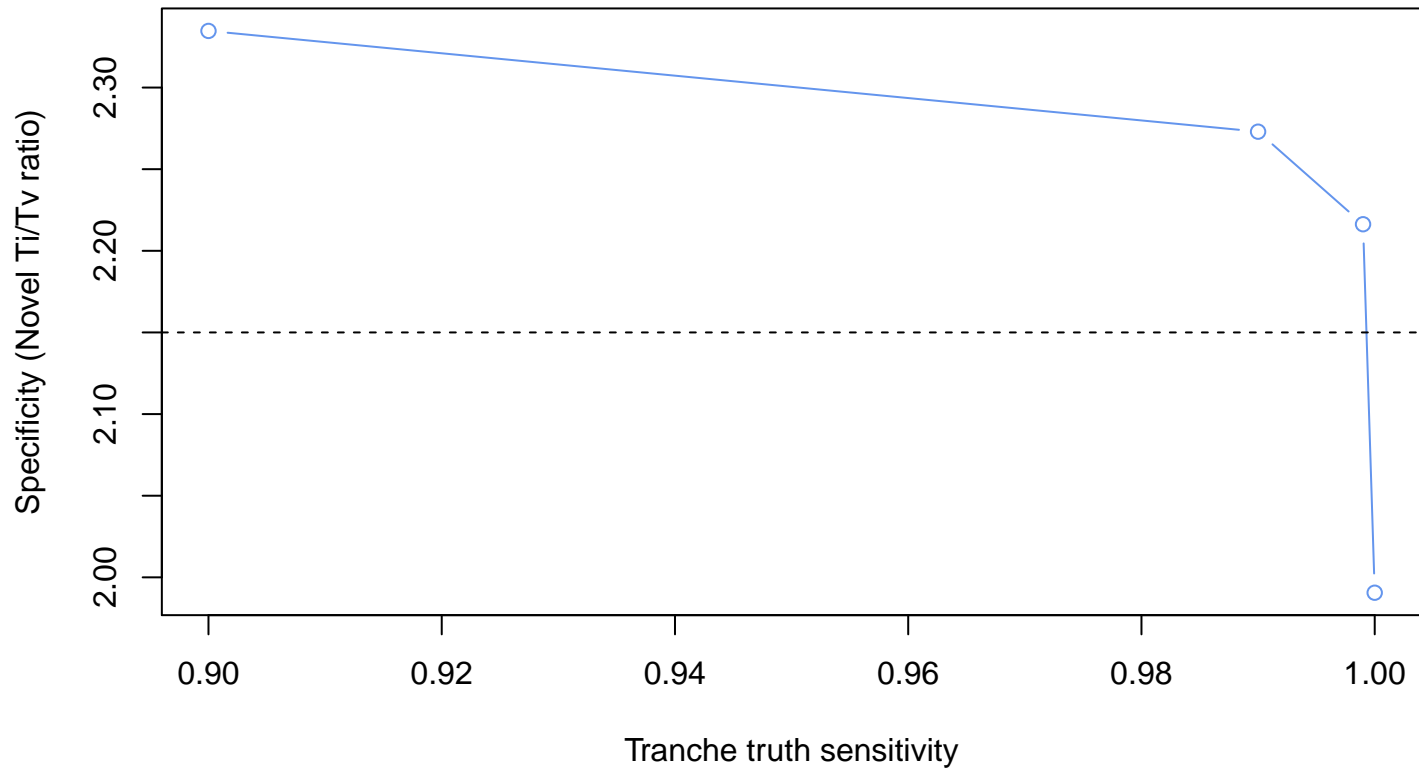

Supplement: 12711_2022_751_MOESM2_ESM.pdf [file 12711_2022_751_MOESM2_ESM.pdf]
