# Supplementary material for: Assessment of genotyping array performance for genome-wide association studies and imputation in African cattle
Source: PubMed Central journal article supplement (PMC9441065; doi:10.1186/s12711-022-00751-5), 2022-09-04

Additional file 6 Figure S3

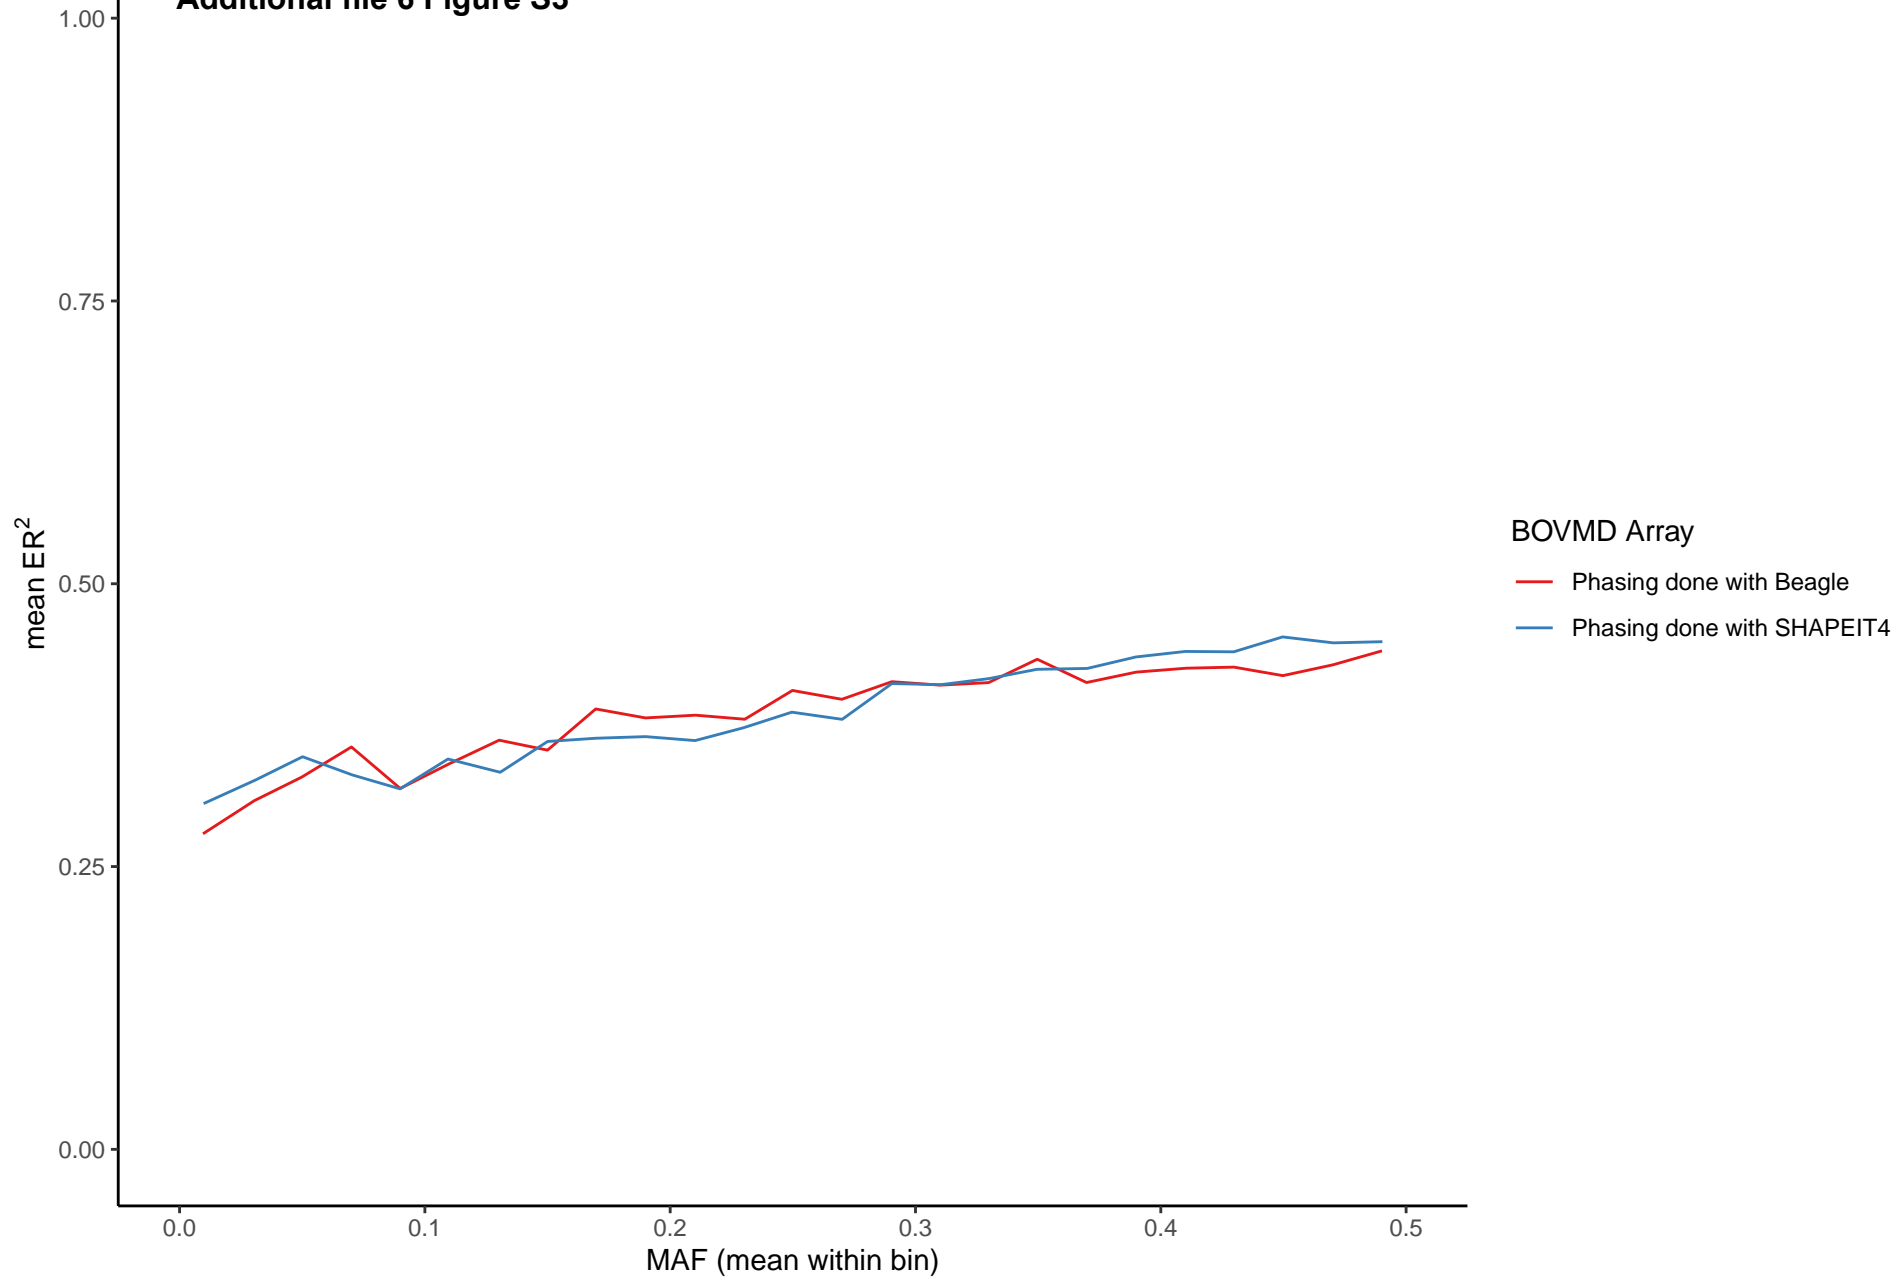

Supplement: 12711_2022_751_MOESM6_ESM.pdf [file 12711_2022_751_MOESM6_ESM.pdf]
